# Supplementary material for: A global non-coding RNA system modulates fission yeast protein levels in response to stress
Source: PubMed Central journal article supplement (PMC4050258; doi:10.1038/ncomms4947), 2014-05-23
Supplement: ncomms4947-s1.pdf [file ncomms4947-s1.pdf]

Supplementary Fig. 1

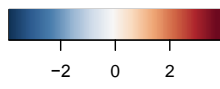

3737 significant transcripts (FDR < 5%)

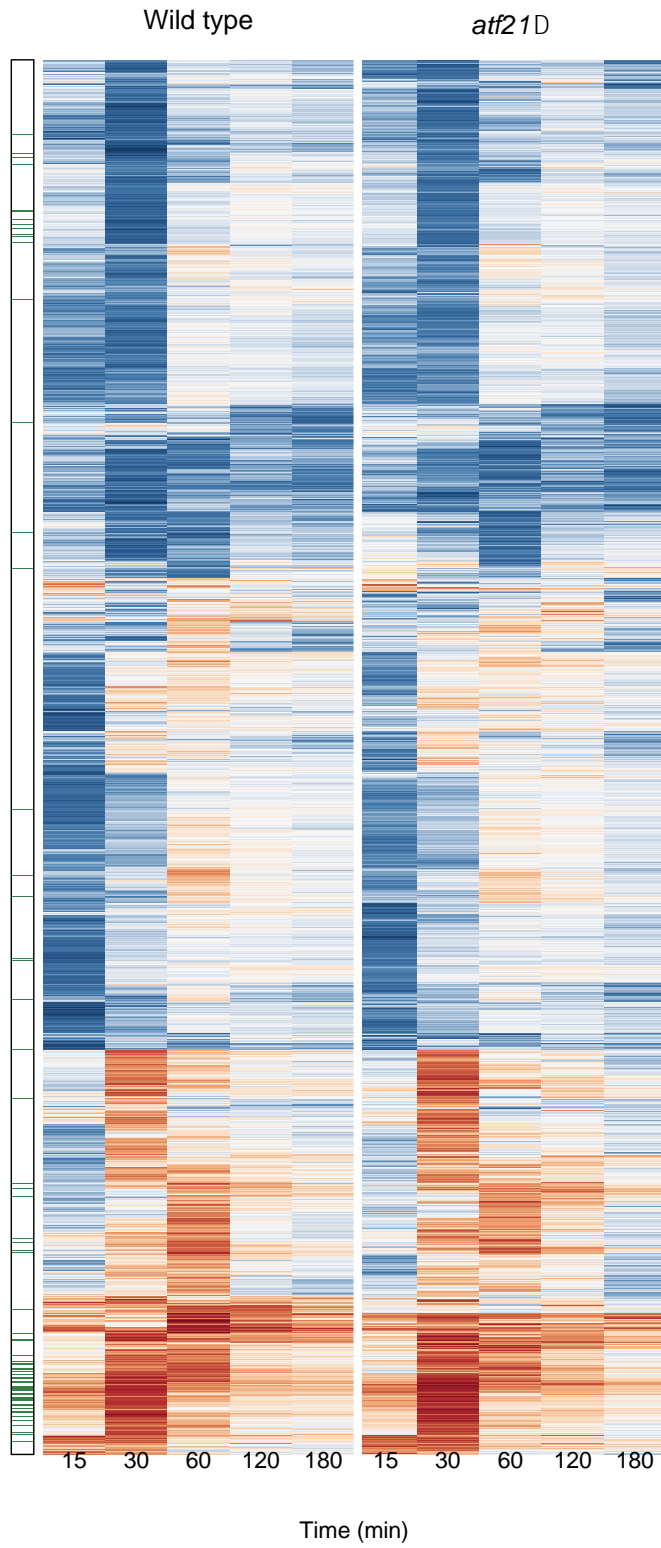

### **Supplementary Fig. 1 Global transcriptomic changes during osmotic stress**

3,737 transcripts that changed significantly in abundance (FDR < 5%) in the wild type and *atf21Δ* strains during osmotic stress. Rows represent log<sub>2</sub> transcript levels relative to 0 min, hierarchically clustered by Euclidean distance. Columns are ordered according to timepoint (three biological replicates per timepoint). Core environmental stress response (CESR) genes are indicated by green colored bar on the left.

## Supplementary Fig. 2

|                                                              | Wild type<br>Up-regulation |     |    |     |     | Wild type<br>Down-regulation |     |     |     |     | <i>atf21D</i><br>Up-regulation |     |    |     |     | <i>atf21D</i><br>Down-regulation |     |     |     |     |
|--------------------------------------------------------------|----------------------------|-----|----|-----|-----|------------------------------|-----|-----|-----|-----|--------------------------------|-----|----|-----|-----|----------------------------------|-----|-----|-----|-----|
|                                                              | 3                          | 8   | 7  | 3   | 2   | 1                            | 4   | 8   | 4   | 5   | 7                              | 7   | 4  | 3   | 1   | 1                                | 4   | 9   | 5   | 4   |
| vitamin metabolic process                                    | 3                          | 8   | 7  | 3   | 2   | 1                            | 4   | 8   | 4   | 5   | 7                              | 7   | 4  | 3   | 1   | 1                                | 4   | 9   | 5   | 4   |
| cofactor metabolic process                                   | 26                         | 29  | 20 | 7   | 7   | 8                            | 15  | 20  | 14  | 14  | 34                             | 34  | 22 | 7   | 7   | 6                                | 20  | 19  | 15  | 9   |
| vacuole organization                                         | 10                         | 19  | 4  | 3   | 5   | 8                            | 3   | 1   | 0   | 0   | 9                              | 18  | 6  | 3   | 3   | 3                                | 1   | 0   | 0   | 0   |
| protein folding                                              | 19                         | 14  | 15 | 1   | 1   | 2                            | 10  | 14  | 10  | 9   | 11                             | 13  | 12 | 0   | 0   | 6                                | 13  | 12  | 11  | 7   |
| osmotic stress specific                                      | 16                         | 14  | 9  | 9   | 10  | 0                            | 0   | 0   | 0   | 0   | 15                             | 14  | 10 | 10  | 8   | 0                                | 1   | 0   | 0   | 0   |
| peroxisome organization                                      | 2                          | 5   | 2  | 0   | 0   | 8                            | 4   | 1   | 0   | 0   | 2                              | 4   | 1  | 0   | 0   | 4                                | 4   | 1   | 0   | 0   |
| nitrogen cycle metabolic process                             | 0                          | 0   | 0  | 0   | 0   | 2                            | 3   | 2   | 4   | 3   | 2                              | 0   | 1  | 0   | 0   | 2                                | 4   | 2   | 5   | 4   |
| transmembrane transport                                      | 30                         | 55  | 25 | 7   | 11  | 72                           | 50  | 39  | 30  | 18  | 32                             | 65  | 31 | 15  | 16  | 51                               | 50  | 33  | 31  | 17  |
| establishment or maintenance of cell polarity                | 8                          | 21  | 6  | 3   | 3   | 20                           | 10  | 0   | 0   | 1   | 8                              | 20  | 6  | 3   | 2   | 16                               | 8   | 0   | 0   | 0   |
| generation of precursor metabolites and energy               | 19                         | 28  | 16 | 8   | 7   | 6                            | 8   | 11  | 10  | 7   | 26                             | 31  | 18 | 10  | 7   | 2                                | 8   | 10  | 9   | 3   |
| carbohydrate metabolic process                               | 30                         | 59  | 42 | 14  | 14  | 24                           | 21  | 8   | 5   | 8   | 36                             | 64  | 44 | 28  | 19  | 18                               | 16  | 9   | 6   | 5   |
| core environmental stress response                           | 85                         | 104 | 90 | 63  | 67  | 17                           | 50  | 39  | 8   | 6   | 89                             | 103 | 84 | 68  | 50  | 14                               | 49  | 31  | 9   | 1   |
| protein modification by small protein conjugation or removal | 26                         | 59  | 24 | 2   | 3   | 24                           | 21  | 3   | 1   | 2   | 18                             | 58  | 23 | 6   | 5   | 14                               | 19  | 0   | 1   | 0   |
| protein catabolic process                                    | 45                         | 85  | 45 | 2   | 4   | 23                           | 13  | 3   | 5   | 3   | 39                             | 81  | 38 | 4   | 3   | 13                               | 12  | 3   | 4   | 2   |
| ribosome biogenesis                                          | 42                         | 7   | 4  | 1   | 1   | 13                           | 179 | 97  | 1   | 3   | 43                             | 6   | 3  | 2   | 4   | 17                               | 185 | 105 | 2   | 2   |
| cytoplasmic translation                                      | 66                         | 10  | 7  | 1   | 1   | 10                           | 53  | 141 | 10  | 13  | 122                            | 12  | 9  | 1   | 4   | 7                                | 41  | 131 | 15  | 4   |
| nucleobase-containing small molecule metabolic process       | 58                         | 86  | 42 | 8   | 10  | 61                           | 87  | 52  | 17  | 22  | 64                             | 84  | 50 | 12  | 8   | 49                               | 97  | 48  | 19  | 11  |
| tRNA metabolic process                                       | 10                         | 4   | 3  | 0   | 1   | 12                           | 57  | 33  | 5   | 7   | 14                             | 3   | 1  | 1   | 0   | 12                               | 72  | 30  | 9   | 2   |
| nucleocytoplasmic transport                                  | 17                         | 8   | 4  | 2   | 1   | 18                           | 39  | 18  | 0   | 0   | 15                             | 9   | 4  | 1   | 4   | 13                               | 42  | 16  | 0   | 0   |
| cellular amino acid metabolic process                        | 37                         | 25  | 18 | 5   | 5   | 13                           | 40  | 77  | 42  | 46  | 53                             | 30  | 15 | 8   | 4   | 10                               | 38  | 69  | 53  | 28  |
| non-coding RNA                                               | 39                         | 57  | 31 | 6   | 8   | 81                           | 73  | 59  | 34  | 32  | 46                             | 72  | 29 | 12  | 4   | 36                               | 74  | 64  | 42  | 33  |
| cytokinesis                                                  | 15                         | 27  | 12 | 4   | 6   | 41                           | 19  | 5   | 1   | 1   | 15                             | 25  | 15 | 7   | 7   | 32                               | 19  | 6   | 0   | 0   |
| cell adhesion                                                | 0                          | 3   | 2  | 2   | 2   | 10                           | 3   | 2   | 0   | 0   | 0                              | 1   | 4  | 2   | 2   | 10                               | 4   | 2   | 0   | 0   |
| protein glycosylation                                        | 3                          | 4   | 3  | 0   | 0   | 19                           | 10  | 1   | 1   | 0   | 1                              | 6   | 5  | 1   | 1   | 10                               | 11  | 0   | 1   | 0   |
| transcription, DNA-dependent                                 | 11                         | 30  | 10 | 2   | 3   | 30                           | 35  | 17  | 1   | 0   | 6                              | 24  | 10 | 1   | 0   | 24                               | 53  | 17  | 3   | 0   |
| DNA replication                                              | 9                          | 16  | 4  | 3   | 3   | 37                           | 26  | 5   | 3   | 2   | 5                              | 15  | 4  | 4   | 2   | 30                               | 35  | 4   | 3   | 2   |
| DNA repair                                                   | 9                          | 28  | 7  | 4   | 2   | 45                           | 23  | 3   | 0   | 1   | 2                              | 16  | 3  | 4   | 0   | 34                               | 28  | 3   | 2   | 3   |
| cytoskeleton organization                                    | 24                         | 31  | 13 | 6   | 6   | 46                           | 20  | 14  | 0   | 3   | 24                             | 33  | 16 | 4   | 4   | 37                               | 35  | 11  | 1   | 2   |
| lipid metabolic process                                      | 19                         | 42  | 23 | 6   | 5   | 46                           | 24  | 19  | 12  | 8   | 23                             | 44  | 24 | 11  | 8   | 25                               | 25  | 15  | 14  | 5   |
| DNA recombination                                            | 5                          | 11  | 1  | 1   | 1   | 26                           | 13  | 2   | 0   | 0   | 4                              | 10  | 2  | 3   | 0   | 26                               | 19  | 0   | 1   | 2   |
| chromosome segregation                                       | 10                         | 20  | 4  | 2   | 0   | 56                           | 30  | 8   | 3   | 4   | 9                              | 19  | 6  | 1   | 2   | 43                               | 46  | 6   | 2   | 3   |
| chromosome organization                                      | 15                         | 24  | 8  | 3   | 0   | 70                           | 34  | 8   | 5   | 5   | 12                             | 22  | 7  | 3   | 3   | 55                               | 54  | 7   | 4   | 6   |
| chromatin modification                                       | 12                         | 31  | 8  | 1   | 0   | 46                           | 30  | 7   | 1   | 1   | 8                              | 29  | 10 | 1   | 2   | 48                               | 45  | 10  | 6   | 3   |
| regulation of transcription, DNA-dependent                   | 31                         | 74  | 24 | 10  | 12  | 83                           | 38  | 14  | 5   | 3   | 22                             | 62  | 27 | 11  | 10  | 70                               | 56  | 14  | 10  | 7   |
| meiosis                                                      | 19                         | 41  | 6  | 0   | 1   | 41                           | 20  | 6   | 3   | 1   | 15                             | 39  | 6  | 1   | 1   | 39                               | 31  | 5   | 2   | 3   |
| vesicle-mediated transport                                   | 32                         | 74  | 25 | 5   | 7   | 66                           | 32  | 7   | 4   | 2   | 37                             | 77  | 32 | 9   | 6   | 48                               | 39  | 5   | 4   | 3   |
| conjugation with cellular fusion                             | 10                         | 26  | 11 | 4   | 5   | 36                           | 12  | 8   | 1   | 1   | 9                              | 25  | 15 | 5   | 6   | 19                               | 14  | 4   | 2   | 2   |
| signaling                                                    | 39                         | 88  | 25 | 10  | 17  | 78                           | 30  | 15  | 3   | 3   | 39                             | 82  | 32 | 12  | 17  | 53                               | 38  | 17  | 4   | 1   |
| regulation of mitotic cell cycle                             | 44                         | 78  | 34 | 11  | 10  | 58                           | 33  | 9   | 4   | 5   | 38                             | 71  | 24 | 13  | 9   | 48                               | 42  | 7   | 5   | 6   |
|                                                              | 15                         | 30  | 60 | 120 | 180 | 15                           | 30  | 60  | 120 | 180 | 15                             | 30  | 60 | 120 | 180 | 15                               | 30  | 60  | 120 | 180 |
|                                                              | Time (min)                 |     |    |     |     |                              |     |     |     |     |                                |     |    |     |     |                                  |     |     |     |     |

**Supplementary Fig. 2 Functional enrichment analysis of differentially regulated transcripts in response to osmotic stress**

Gene Ontology (GO) Slim terms that are significantly enriched in the up- and down-regulated genes following sorbitol treatment in the wild type and *atf21Δ* cells are shown (hypergeometric test, FDR < 0.05). The count in each cell represents the number of differentially expressed genes that are annotated to the GO Slim term. Up-regulated genes that are significantly enriched for a specific functional term are colored in red, down-regulated genes in blue.

### Supplementary Fig. 3

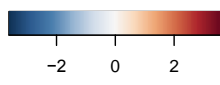

506 significant proteins (FDR < 5%)

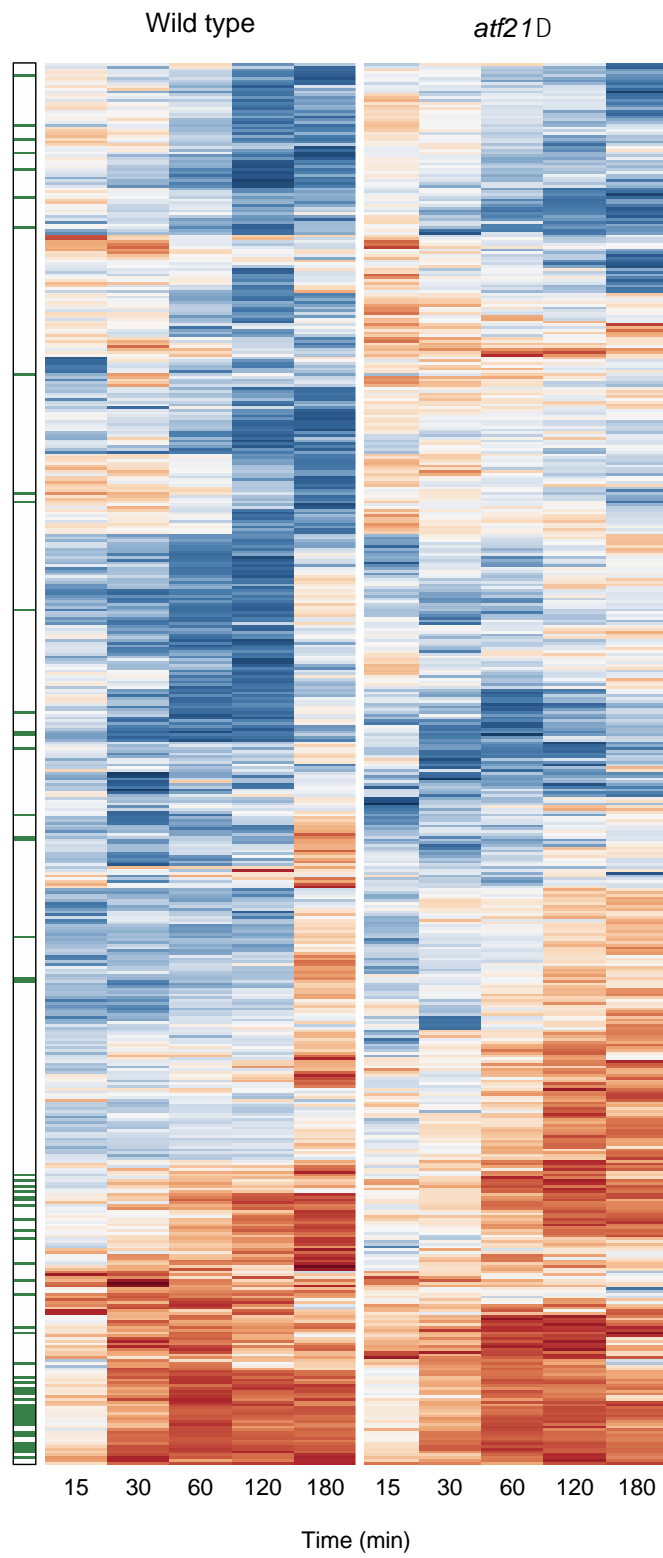

### **Supplementary Fig. 3 Changes in proteome during osmotic stress**

506 proteins that changed significantly in abundance (FDR < 5%) in the wild type and *atf21Δ* strains during osmotic stress. Rows represent  $\log_2$  abundance levels relative to 0 min, hierarchically clustered by Euclidean distance. Columns are ordered according to timepoint (three biological replicates per timepoint). Core environmental stress response (CESR) genes are indicated by green colored bar on the left.

## Supplementary Fig. 4

|                                       | Wild type<br>Up-regulation |    |    |     |     | Wild type<br>Down-regulation |    |    |     |     | <i>atf21D</i><br>Up-regulation |    |    |     |     | <i>atf21D</i><br>Down-regulation |    |    |     |     |
|---------------------------------------|----------------------------|----|----|-----|-----|------------------------------|----|----|-----|-----|--------------------------------|----|----|-----|-----|----------------------------------|----|----|-----|-----|
|                                       | 15                         | 30 | 60 | 120 | 180 | 15                           | 30 | 60 | 120 | 180 | 15                             | 30 | 60 | 120 | 180 | 15                               | 30 | 60 | 120 | 180 |
| tRNA metabolic process                | 0                          | 0  | 0  | 0   | 1   | 6                            | 8  | 9  | 19  | 7   | 0                              | 0  | 1  | 1   | 4   | 4                                | 3  | 4  | 3   | 3   |
| cytoplasmic translation               | 2                          | 0  | 1  | 1   | 9   | 23                           | 18 | 30 | 48  | 15  | 0                              | 1  | 3  | 5   | 13  | 17                               | 0  | 4  | 5   | 6   |
| transmembrane transport               | 0                          | 2  | 2  | 2   | 3   | 5                            | 8  | 11 | 15  | 10  | 0                              | 1  | 2  | 2   | 4   | 0                                | 10 | 7  | 7   | 7   |
| ribosome biogenesis                   | 0                          | 2  | 1  | 1   | 13  | 14                           | 18 | 25 | 28  | 2   | 1                              | 0  | 3  | 9   | 8   | 18                               | 7  | 8  | 4   | 1   |
| protein folding                       | 1                          | 1  | 0  | 0   | 1   | 4                            | 3  | 6  | 16  | 11  | 1                              | 1  | 1  | 0   | 1   | 1                                | 1  | 1  | 5   | 13  |
| cellular amino acid metabolic process | 3                          | 2  | 2  | 2   | 4   | 6                            | 6  | 12 | 40  | 35  | 3                              | 0  | 2  | 4   | 7   | 5                                | 1  | 3  | 6   | 13  |
| osmotic stress specific               | 2                          | 2  | 2  | 2   | 2   | 0                            | 0  | 0  | 0   | 0   | 1                              | 1  | 2  | 1   | 1   | 0                                | 0  | 0  | 0   | 0   |
| protein glycosylation                 | 0                          | 0  | 0  | 0   | 0   | 2                            | 3  | 0  | 0   | 0   | 0                              | 0  | 0  | 0   | 3   | 0                                | 4  | 1  | 0   | 0   |
| core environmental stress response    | 10                         | 27 | 32 | 30  | 32  | 4                            | 8  | 10 | 12  | 9   | 4                              | 22 | 31 | 32  | 32  | 3                                | 5  | 5  | 8   | 6   |
| carbohydrate metabolic process        | 4                          | 13 | 9  | 9   | 11  | 1                            | 1  | 2  | 5   | 8   | 2                              | 6  | 10 | 13  | 9   | 0                                | 1  | 1  | 2   | 4   |

### Supplementary Fig. 4 Functional enrichment analysis of differentially regulated proteins in response to osmotic stress

As in Supplementary Fig. 1, but for differentially regulated proteins that showed statistically significant changes in abundance upon sorbitol treatment.

## Supplementary Fig. 5

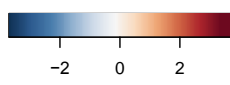

336 significant ncRNAs (FDR < 5%)

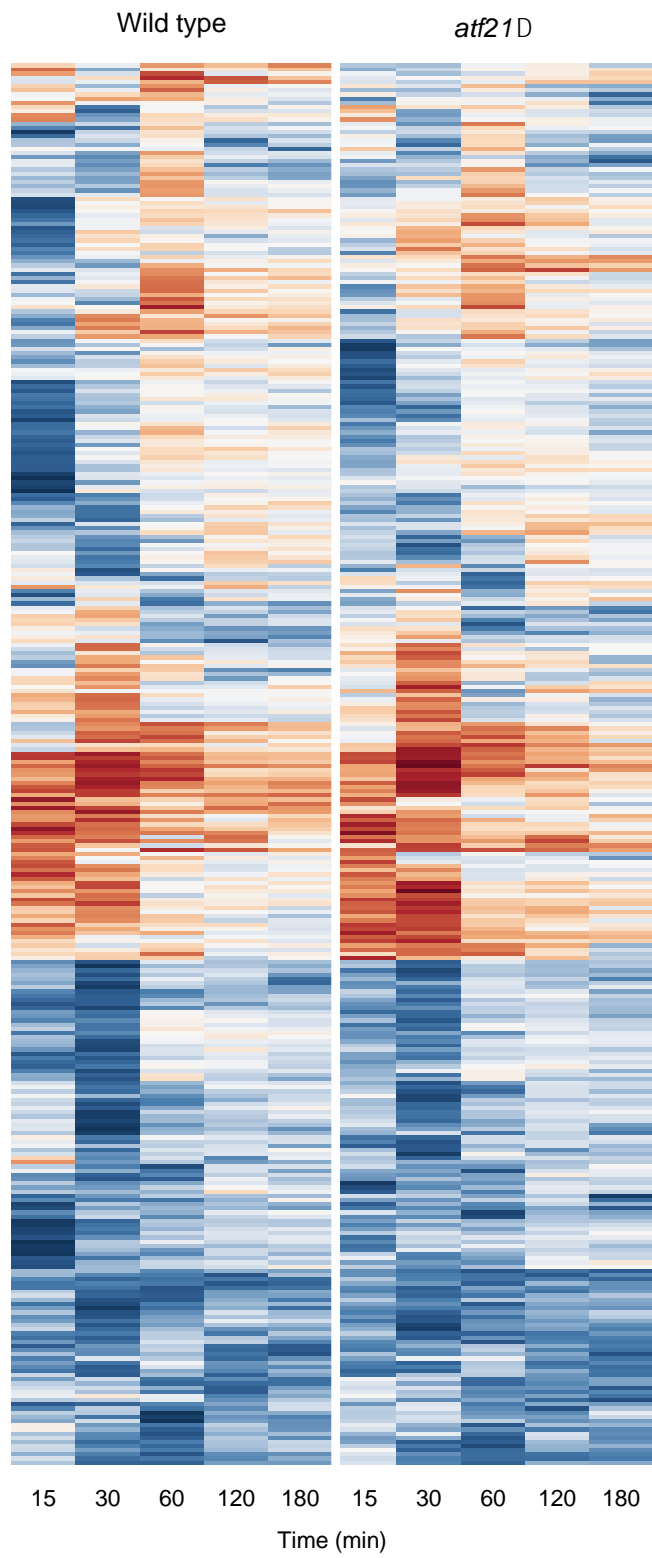



**Supplementary Fig. 5 Osmotic stress induced changes in ncRNAs levels**

336 ncRNAs that changed significantly (FDR < 5%) in the wild type and *aff21Δ* cells during osmotic stress. Rows represent  $\log_2$  abundance levels relative to 0 min, hierarchically clustered by Euclidean distance. Columns are ordered according to timepoint (three biological replicates per timepoint).

## Supplementary Fig. 6

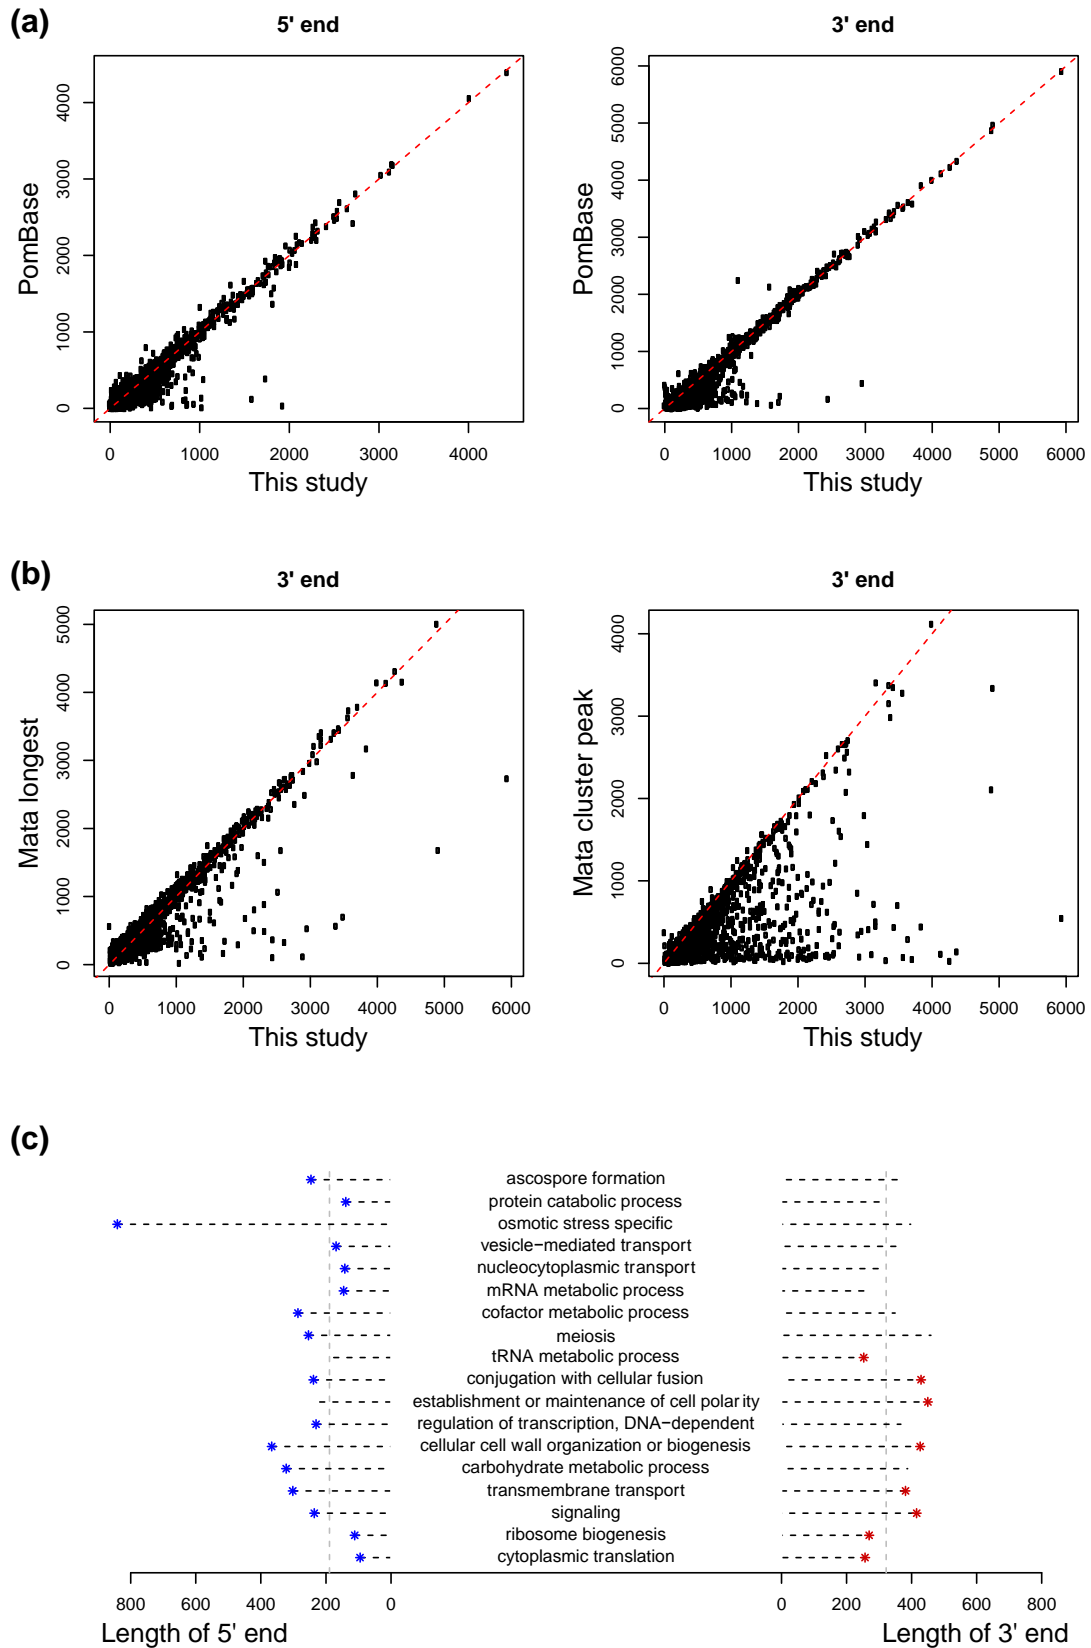

### Supplementary Fig. 6 Context specific re-annotation of gene boundaries

The RNA-seq data of the entire osmotic stress time course encompassing both wild type and *atf21Δ* were used to perform a context specific re-annotation of the gene boundaries for each sample independently. For each gene the most distal 5' and 3' end was identified and used to define the maximal extent of the locus. **(a)** The lengths of these *de novo* re-annotations were compared to the length of annotated untranslated regions (UTR) in PomBase. **(b)** A comparison of the 3' extents of 3655 genes that have unambiguous boundary assignment in our study to the two different UTR assignments reported in Mata *et al.* (2013, *RNA Biology*, 10: 1407-1414). The first assignment 'Mata longest' is based on the most distal cleavage and polyadenylation site identified using the 3PC (3' PolyA site mapping using cDNA circularization) protocol, and the second assignment 'Mata cluster peak' is based on the peak of the most distal cluster. **(c)** Association between gene boundaries and GO Slim terms. Each row corresponds to a GO Slim category. The vertical grey dashed lines indicate median width of the boundary extents. Red (3' end) and blue (5' end) dots identify cases where the median for the category is significantly different from the genome-wide UTR median (two-sided Wilcoxon test, FDR < 5%).

# Supplementary Fig. 7

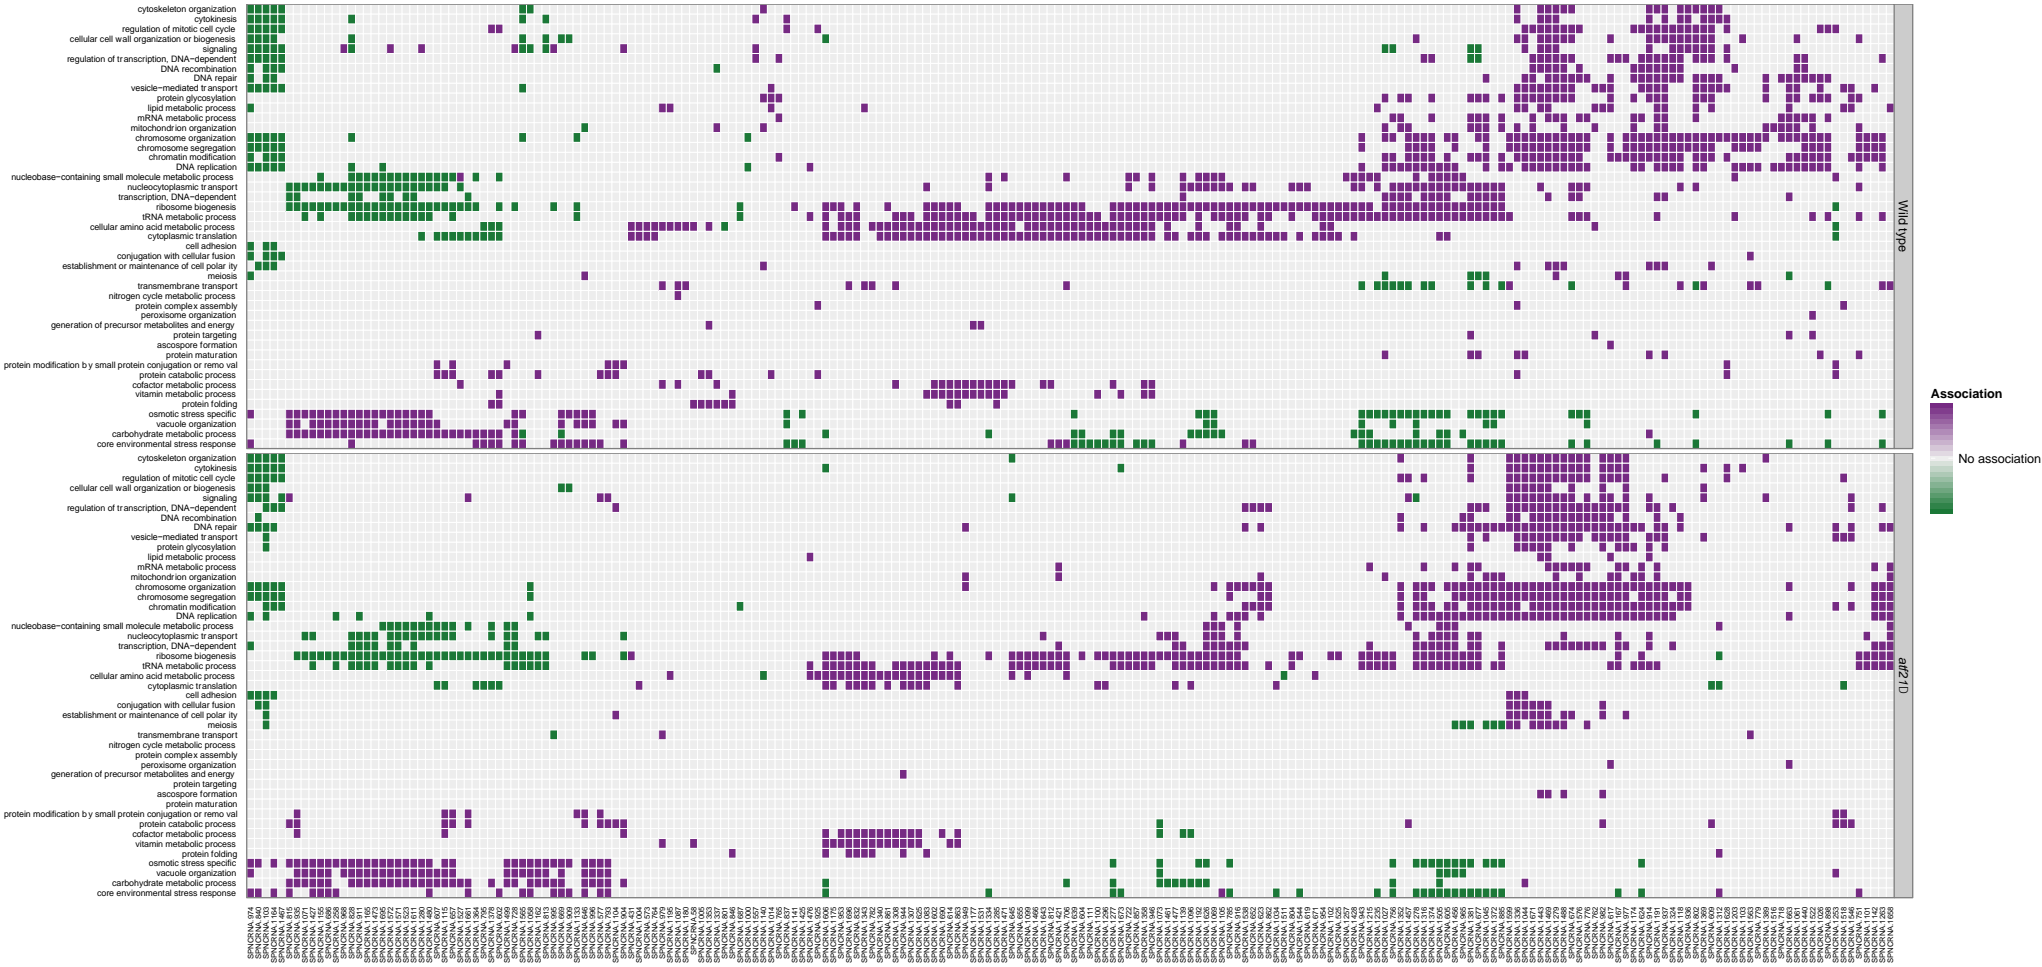

**Supplementary Fig. 7 Significant associations between ncRNAs and protein coding gene families in the wild type and *atf21Δ* cells**

Functionally related groups of genes that were significantly associated with the osmotic stress-responsive ncRNAs in the WT and *atf21Δ* cells. Colored cells correspond to ncRNAs that are positively correlated (Pearson  $\rho > 0.7$ ; purple) or anti-correlated (Pearson  $\rho < -0.7$ ; green) with expression profiles of a significant number of protein coding transcripts in a given GO Slim category (FDR < 5%).

**Supplementary Table 1. *S. pombe* strains used in this study**

| <b>Strain</b> | <b>Genotype</b>                                          | <b>Source</b>               |
|---------------|----------------------------------------------------------|-----------------------------|
| <b>IH5974</b> | <i>972h<sup>-</sup></i>                                  | Stock from Iain Hagan's lab |
| <b>IH8810</b> | <i>atf21::kanMX6 ade6.M210</i>                           | Stock from Iain Hagan's lab |
| <b>NJ2</b>    | <i>h<sup>+</sup> ura4-D18 leu1-32 ade6-M210 his7-366</i> | Stock from Nic Jones's lab  |
| <b>NJ293</b>  | <i>sty1::kan ura4-D18 leu1-32 ade6-M210 his7-366</i>     | Stock from Nic Jones's lab  |
| <b>CJM74</b>  | <i>972h<sup>-</sup> snr1L::natMX6</i>                    | This study <sup>1</sup>     |
| <b>CJM84</b>  | <i>972h<sup>-</sup> snr1S::natMX6</i>                    | This study <sup>2</sup>     |

<sup>1</sup> In this deletion strain, the full-length *SPNCRNA.1164* transcript located at chr III: 966,133-971,255 (genomic coordinates are based on Pombase database release 11) was deleted using the PCR deletion technique described in Online Methods. This deletion strain is referred to as Stress-responsive Non-coding RNA 1 Long (*snr1L*) in the paper.

<sup>2</sup> In this deletion strain, only the 5' fragment of *SPNCRNA.1164* (chr III: 968,557-971,255), which does not overlap with other non-coding transcripts, was deleted. This deletion strain is referred to as Stress-responsive Non-coding RNA 1 Short (*snr1S*) in the paper.

Supplementary Table 2. Primers used in this study

| ID                  | Forward primer           | Reverse primer             | <sup>a</sup> Probe # |
|---------------------|--------------------------|----------------------------|----------------------|
| Atf1                | ttccatagcatcacctgatatctt | ccaagcaggatagcccaac        | 1                    |
| Atf21               | tgcaaggaattcgacaata      | tcaatgtttctgaaaggacataattc | 110                  |
| Atf31               | cgaggcttcacacaactcac     | ttggaagtgtttcatcacctg      | 42                   |
| Pcr1                | tccgatgatgtccagcaa       | cccaccaagggatctagga        | 66                   |
| <i>SPNCRNA.1164</i> | tctttcttttctcttctattgctc | caattcaatcaatttgggttca     | 153                  |
| Sty1                | tctttgatcctcgttaagcgtatt | ggatcatggtatggagcaaga      | 146                  |
| Caf5                | cgtcagtacgctcttttacgc    | gaagcagccaaataactgaaaca    | 57                   |
| Bfr1                | cccgaaaaagacaactttgg     | gacgatagagctcatgcttgg      | 53                   |
| Tpx1                | gacgaggctctccgtcttc      | gcaaacctcaccgtgctc         | 97                   |
| Gst2                | aaagcttacgcttggatcaa     | tgccaattcttcgaaagtagc      | 62                   |
| Trr1                | ttttggctactgggtcttcc     | tgccaataagtatcctcaccagt    | 141                  |
| Cdc2                | aaaaatacatggaccgaatttca  | ttttgaacaagtctcggatctaaac  | 57                   |
| Ptc2                | ggctgcagacaatgcgtta      | gtagctgtgcatcccgaag        | 4                    |

<sup>a</sup>This is the probe number from Roche Applied Science's Universal ProbeLibrary.
